# Supplementary material for: Factors influencing women’s decision-making regarding complementary medicine product use in pregnancy and lactation
Source: PubMed Central journal article supplement (PMC6686446; doi:10.1186/s12884-019-2396-2), 2019-08-07
Supplement: 12884_2019_2396_MOESM2_ESM.pdf [file 12884_2019_2396_MOESM2_ESM.pdf]

## Additional file 2. Types of CMPs used in pregnancy and lactation

As reported by participants in the study by Barnes, Barclay, McCaffery and Aslani (2019) Factors influencing women's decision-making regarding complementary medicine product use in pregnancy and lactation, *BMC Pregnancy and Childbirth*.

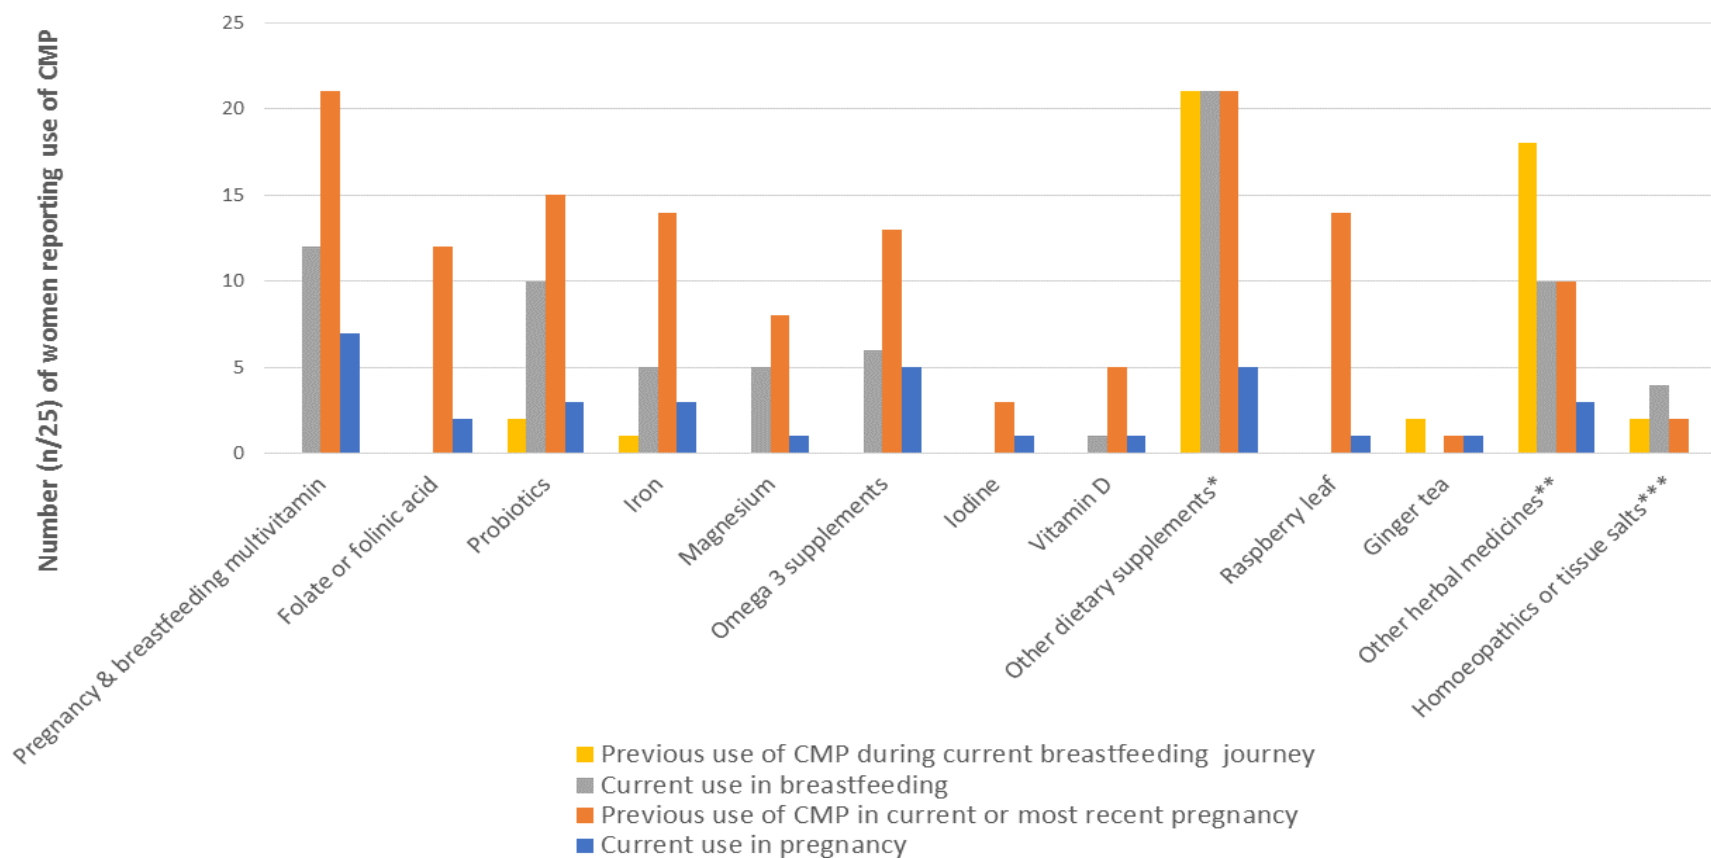

\*Other dietary supplements included Evening primrose oil, Calcium, Magnesium, Vitamins C, B complex and B6, Zinc, Selenium, Lecithin, Brewer's yeast, a mixed vitamin-mineral thyroid support tablet, Glutathione, Calcium di-gluconate

\*\* Other herbal medicines included herbal extract blends and supplements individually prescribed by participants' HCPs for various health conditions, several different herbal teas taken to support breastfeeding (supply and to treat / prevent mastitis), and/or to support digestion

\*\*\* Used to treat nausea, mastitis, for labour induction or unspecified reason
